# Supplementary figures and images for: Fucoidan Improves D-Galactose-Induced Cognitive Dysfunction by Promoting Mitochondrial Biogenesis and Maintaining Gut Microbiome Homeostasis
Source: MDPI journal article supplement (doi:10.3390/nu16101512), 2024-05-17

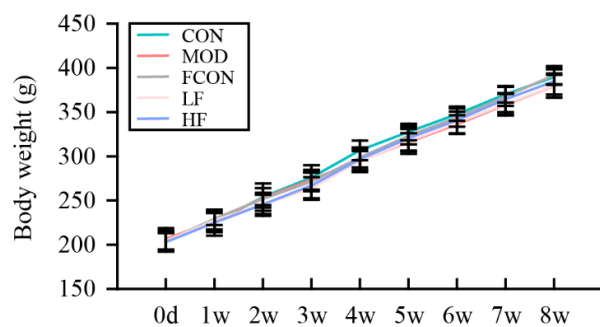

**Figure S1.** Body weight among the groups during the experimental period.

Supplement: s1 [file s1]
